# Supplementary material for: Power Consumption: Base Stations of Telecommunication in Sahel Zone of Cameroon: Typology Based on the Power Consumption—Model and Energy Savings
Source: Hindawi journal article supplement (doi:10.1155/2016/3161060), 2016-01-01
Supplement: f1 [file 3161060.f1.docx]

***Supplementary material***

***Annexes 1***

1. ***Equipment of TV room***


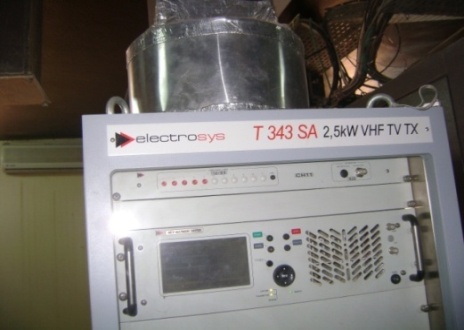

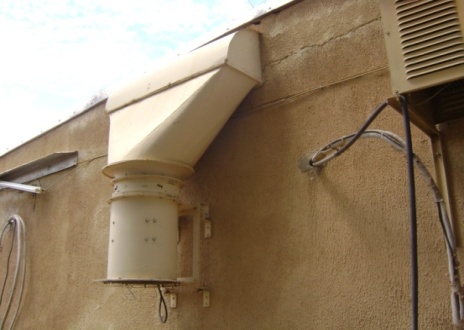


a) Emitter and receiver of TV from CRTV Maroua b) External view of air extractor from TV room

1. ***Equipment of FM room***


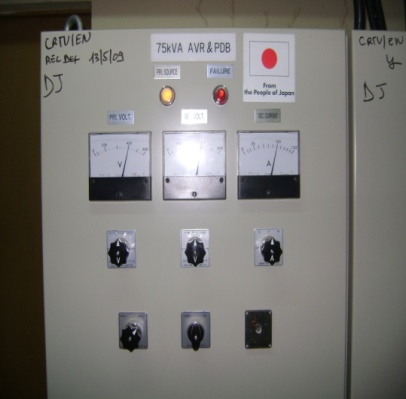

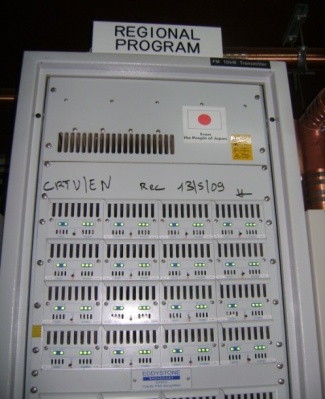

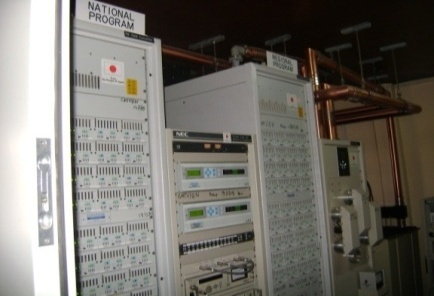


*a) On left to right, are represented: voltage regulator, emitter/receiver FM for the far north region, transmitters FM of regional and national signals*

*
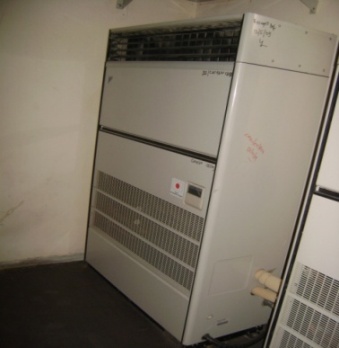

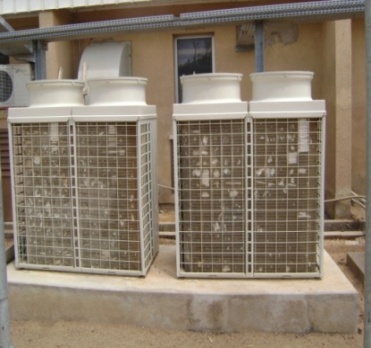
*

*b) Air conditioner system, cooling both transmitters FM of regional and national signals*

*On the left to the right, evaporator of air conditioner situated in FM room and condensers of air conditioner situated outside the room*


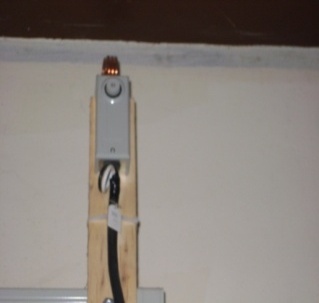

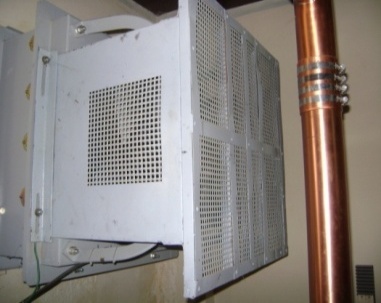

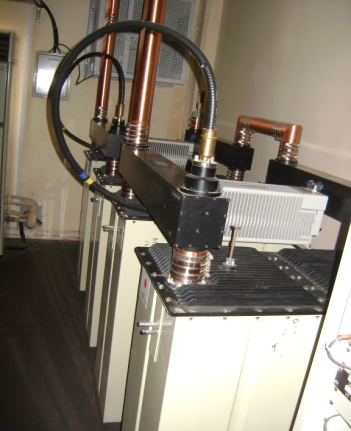


*c) On the left to the right: temperature sensor that give information to the dehydrator, the dehydrator, frequencies combiner (dummy load) to be routed to antennas*


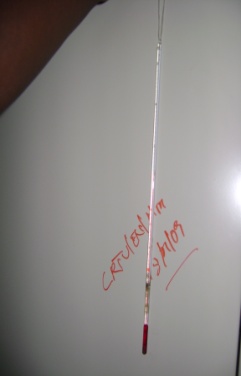

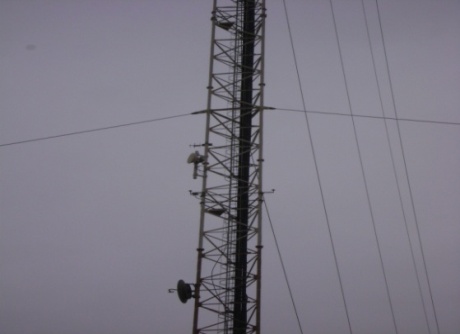

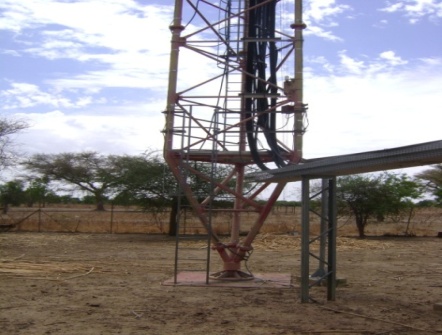


*d) On the left to the right: temperature sensor which give FM room's temperature, antennas on the towers, cables of antennas located on tower.*

1. ***Equipment of RFI room***

**
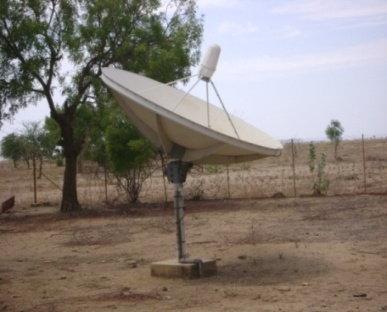

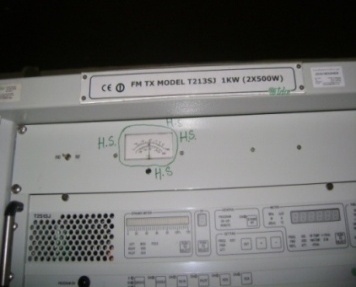
**

a) Receiver of RFI satellite's waves on the CRTV Maroua site

*b) FM RFI Emitter's/receiver's on CRTV Maroua site*

**
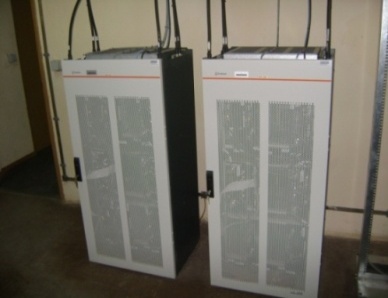

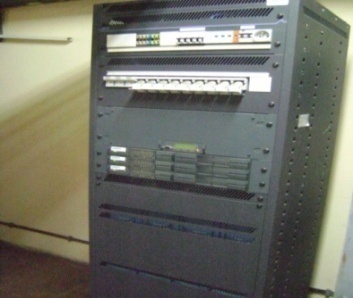
**

*d) Batteries, batteries charger's and controller's*

*c) TX/RX 900GSM and 1800GSM*

*in RFI room*

***Annexes 2***

***Equipment of MTN sites***


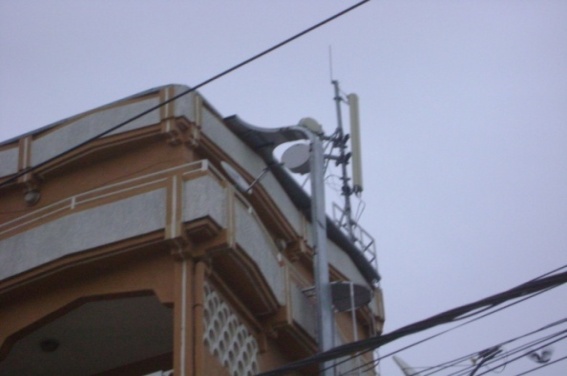

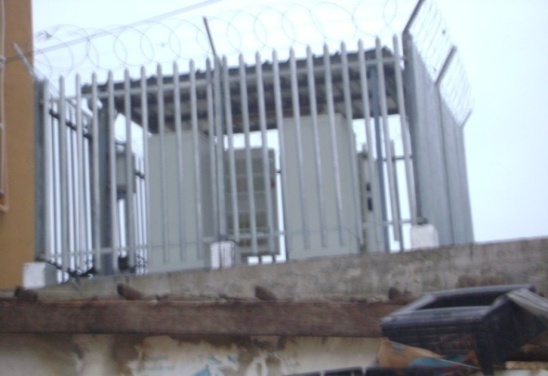


*a) Outdoor base station of MTN Maroua Market*

**
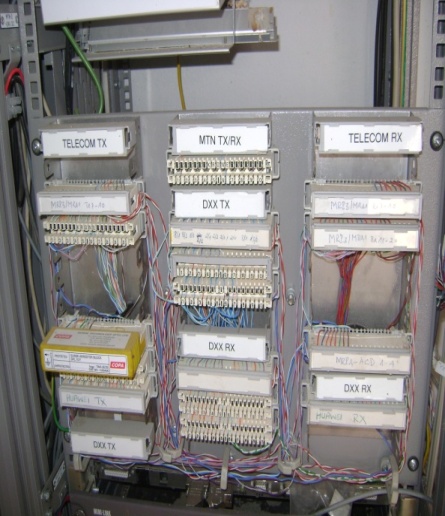

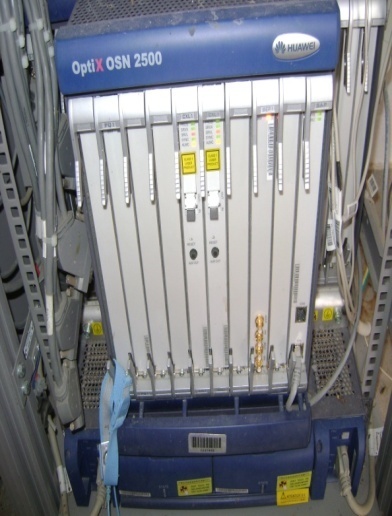
**
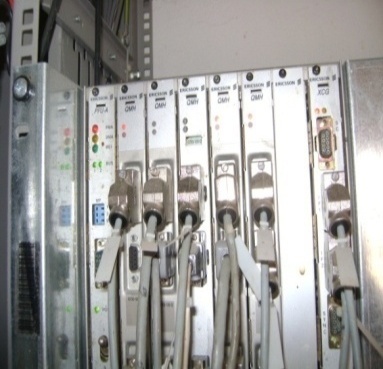


*b) MTN Missinguileo base station: on the left to the right TX/RX equipements ,Huawei OSN 2500 multiplexer, radio equipment*

**
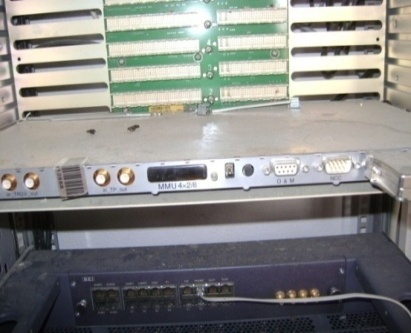

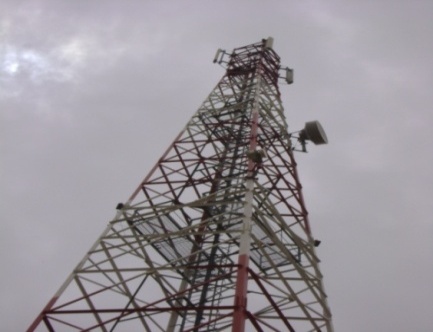

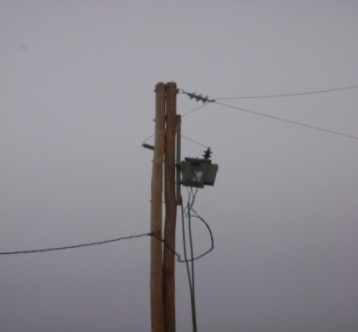
**

*c) MTN Missinguileo base station: on the left to the right ERICSON multiplexer,antennas tower and power supply from AES-sonel*

**
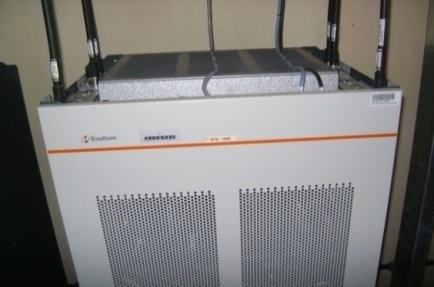

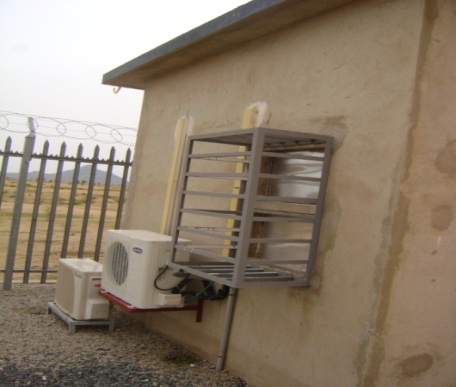
**

*d) MTN Missinguileo base station: on the left to the right BTS GSM 900 equipment located in the room and air conditioner condensers' located outside of the room*

**
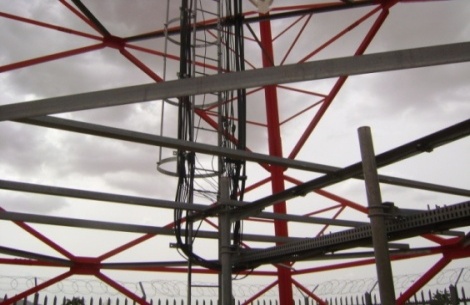

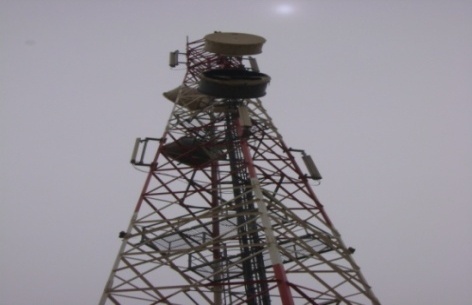
**

*f) MTN Missinguileo base station: Tower with differents directions of radios*

*e) MTN Missinguileo base station: cables from antennas located on the tower*

**
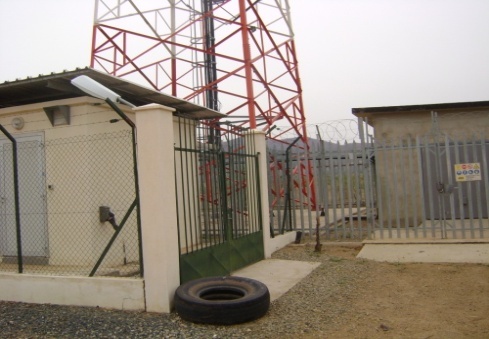
**

*g) MTN Missinguileo base station: An exemple of site which have MTN and ORANGE antennas located on the same tower. The equipments are located on differents rooms*
